# Supplementary material for: Downregulated expression of ARHGAP10 correlates with advanced stage and high Ki-67 index in breast cancer
Source: PeerJ. 2019 Aug 1;7:e7431. doi: 10.7717/peerj.7431 (PMC6679923; doi:10.7717/peerj.7431)
Supplement: Table S1 [file peerj-07-7431-s022.xlsx]

## Sheet: Sheet1
NAME	GS<br> follow link to MSigDB	GS DETAILS	SIZE	ES	NES	NOM p-val	FDR q-val	FWER p-val	RANK AT MAX	LEADING EDGE
KEGG_PROTEIN_EXPORT	KEGG_PROTEIN_EXPORT	Details ...	22	0.762615	2.09075	0	0.0145266	0.015	2120	tags=55%, list=11%, signal=61%
KEGG_NUCLEOTIDE_EXCISION_REPAIR	KEGG_NUCLEOTIDE_EXCISION_REPAIR	Details ...	44	0.509482	1.68477	0.028169	0.212968	0.549	5956	tags=59%, list=30%, signal=85%
KEGG_BASE_EXCISION_REPAIR	KEGG_BASE_EXCISION_REPAIR	Details ...	33	0.543064	1.59315	0.0393701	0.224193	0.748	4646	tags=55%, list=24%, signal=71%
KEGG_FOCAL_ADHESION	KEGG_FOCAL_ADHESION	Details ...	197	-0.565101	-2.16675	0	0.0018766	0.006	3061	tags=44%, list=16%, signal=51%
KEGG_JAK_STAT_SIGNALING_PATHWAY	KEGG_JAK_STAT_SIGNALING_PATHWAY	Details ...	151	-0.555691	-2.0492	0	0.00551928	0.028	4520	tags=50%, list=23%, signal=65%
KEGG_REGULATION_OF_ACTIN_CYTOSKELETON	KEGG_REGULATION_OF_ACTIN_CYTOSKELETON	Details ...	211	-0.464858	-2.03564	0	0.00510398	0.032	3756	tags=36%, list=19%, signal=44%
