# Supplementary material for: Downregulated expression of ARHGAP10 correlates with advanced stage and high Ki-67 index in breast cancer
Source: PeerJ. 2019 Aug 1;7:e7431. doi: 10.7717/peerj.7431 (PMC6679923; doi:10.7717/peerj.7431)
Supplement: Table S2 [file peerj-07-7431-s023.xlsx]

## Sheet: Sheet1
	98T	98P	106T	106P	HXQ-11T	HXQ-11P	HXQ-17T	HXQ-17P	HXQ-18T	HXQ-18P	HXQ-20T	HXQ-20P	HXQ-23T	HXQ-23P	HXQ-28T	HXQ-28P	HXQ-29T	HXQ-29P	HXQ-30T	HXQ-30P	HXQ-14T	HXQ-14P	HXQ-24T	HXQ-24P	94T	94P	95T	95P	91T	91P
ARHGAP10	25.3928	26.2406	26.6241	28.3073	26.14	25.97	27.13	26.27	26.3	26	25.64	26.76	25.83	25.8	26.18	25.38	25.22	26.96	24.62	25.44	26.03	27.5	25.95	24.91	24.9168	25.0198	25.7995	25.4669	25.228	28.4279
ARHGAP10	26.1321	26.163	27.2132	30.4382	26.14	25.83	27.04	26.06	26.39	25.83	25.53	26.71	25.71	25.41	26.11	25.38	25.14	26.58	24.69	25.24	26.06	27.45	25.73	24.57	24.7032	24.3523	32.2521	25.2028	25.9131	28.2663
ARHGAP10	25.9571	26.2531	26.7864	28.1926	26.21	25.86	26.95	25.94	26.39	25.95	25.41	27.9	25.72	25.57	26.06	25.24	25.27	26.9	24.7	25.37	26.01	27.49	25.88	24.67	na	na	25.9672	25.5018	25.8724	29.3624
GAPDH	16.5859	18.8002	18.5521	21.9633	19.23	20.49	22	20.65	18.83	20.12	18.28	22.06	19	20.82	19.61	19.75	19.59	21.24	19	19.59	17.72	23.35	19.34	18.84	17.6006	18.6081	18.0775	18.9092	16.1037	23.5524
GAPDH	17.0784	19.3049	18.5988	23.01	19.47	20.99	21.69	20.65	18.79	20.11	18.29	22.1	19	20.81	19.51	19.85	19.64	21.29	19.19	19.73	17.6	23.51	19.39	18.96	17.5203	17.6852	17.601	18.2397	16.2125	24.2803
GAPDH	17.7804	19.0707	18.8401	23.9031	19.36	20.59	21.76	20.7	18.8	20.2	18.2	22.18	19.17	21.06	19.92	19.96	19.99	21.38	19.19	19.66	17.7	23.3	19.59	19.04	na	na	17.6397	18.7478	16.3274	24.6882
	78T	78P	74T	74P	72P	72T	87T	87P	88T	88P	79T	79P	92T	92P	110T	110P	109T	109P	112T	112P	73P	73T	76P	76T	77T	77P	96T	96P	94T	94P
ARHGAP10	24.9858	26.2494	25.5179	24.9188	25.0321	26.185	26.1067	26.1926	25.4088	24.5511	24.8681	28.0232	25.5277	28.2082	25.0261	28.512	22.0224	26.4108	26.4604	26.7877	24.4991	25.9703	25.0221	22.189	24.8779	24.4235	25.36	26.6794	25.137	25.0256
ARHGAP10	24.9855	26.1805	25.6902	24.7476	24.5546	26.1769	26.0094	26.1053	25.5874	25.0267	24.8016	28.2068	26.0331	29.4337	25.0875	28.9556	22.0156	26.2345	27.1403	32.0928	na	25.6394	24.662	22.1828	25.3097	24.635	25.714	27.0923	25.4026	25.0497
ARHGAP10	24.8636	26.2993	25.5378	24.5892	24.6812	26.2826	26.0367	26.3681	25.4981	24.1121	24.9443	28.0121	na	na	25.2008	29.2035	22.2198	26.553	27.3751	na	24.4853	25.248	24.732	23.146	25.4124	24.9669	26.3586	27.1139	25.2731	24.7966
GAPDH	17.3427	20.2716	19.137	19.0224	17.0967	17.682	17.1463	18.5264	17.3189	18.3014	16.2763	20.4085	18.2351	22.0575	17.0279	23.3521	16.4798	19.9744	18.1428	27.4061	17.4154	16.3269	18.5404	14.3738	17.3799	19.8612	15.2749	19.0108	17.2028	17.3626
GAPDH	17.3846	20.2507	19.0673	18.5811	17.1357	17.8985	17.0661	18.6357	17.3268	18.2126	16.2763	21.0171	18.1246	23.7132	16.608	22.6245	16.3538	20.1218	17.9332	24.994	17.4179	16.234	18.9883	14.3553	17.3387	19.0234	15.9456	18.8823	17.4943	17.3492
GAPDH	17.2926	20.6479	19.3723	18.3728	17.0802	17.8709	17.1863	18.5994	17.3422	18.5178	16.259	20.1546	na	na	17.1807	23.3934	na	19.6203	17.8772	24.609	17.4478	16.3249	18.9968	14.351	17.2965	19.3886	16.0837	20.0393	17.5256	17.5013
