# Supplementary material for: Downregulated expression of ARHGAP10 correlates with advanced stage and high Ki-67 index in breast cancer
Source: PeerJ. 2019 Aug 1;7:e7431. doi: 10.7717/peerj.7431 (PMC6679923; doi:10.7717/peerj.7431)
Supplement: Table S3 [file peerj-07-7431-s024.xlsx]

## Sheet: Sheet1
MCF10A-ARHGAP10	MCF10A-GAPDH	VALUE
28.93	20.84	0.00367
29.1	20.46	0.002507
28.68	20.44	0.003308
MB231-ARHGAP10	MB231-GAPDH
28.7	18.78	0.001032
28.73	18.83	0.001047
28.72	18.81	0.001039
MB468-ARHGAP10	MB468-GAPDH
29.37	19.6	0.00114535
29.33	19.57	0.00115331
29.44	19.59	0.00108356
BT549-ARHGAP10	BT549-GAPDH
28.78	19.4	0.001501
28.88	19.38	0.001381
28.84	19.4	0.00144
MCF7-ARHGAP10	MCF7-GAPDH
18.23	26.66	0.00289946
18.21	26.73	0.00272411
18.21	26.72	0.00274306
