# Supplementary material for: Downregulated expression of ARHGAP10 correlates with advanced stage and high Ki-67 index in breast cancer
Source: PeerJ. 2019 Aug 1;7:e7431. doi: 10.7717/peerj.7431 (PMC6679923; doi:10.7717/peerj.7431)
Supplement: Table S4 [file peerj-07-7431-s025.xlsx]

## Sheet: Sheet1
1	0.102002	0.004187
2	0.073983	0.008431
3	0.04259	0.001874
4	0.043586	0.001477
5	0.004235	0.002187
6	0.043185	0.002794
7	0.009912	0.001806
8	0.18471	0.006434
9	0.013261	0.038208
10	0.00727	0.005002
11	0.018199	0.016824
12	0.013824	0.015625
13	0.056198	0.000675
